# Supplementary material for: Subcutaneous azacitidine maintenance in transplant-ineligible patients with acute myeloid leukemia: a single-center retrospective study
Source: PubMed Central journal article supplement — Haematologica. 2023 Mar 30;108(10):2850–4. doi: 10.3324/haematol.2022.282009 (PMC10542839; doi:10.3324/haematol.2022.282009), 2023-03-30

# Subcutaneous azacitidine maintenance in transplant-ineligible patients with acute myeloid leukemia: a single-center retrospective study

Natacha Johnson,<sup>1</sup> Marie Templé,<sup>2</sup> Chloe Friedrich,<sup>2,3</sup> Lise Willems,<sup>1</sup> Rudy Birsén,<sup>1</sup> Marguerite Vignon,<sup>1</sup> Paul Deschamps,<sup>1</sup> Patricia Franchi,<sup>1</sup> Johanna Mondesir,<sup>1</sup> Benedicte Deau-Fischer,<sup>1</sup> Elsa Miekoutima,<sup>1</sup> Ismaël Boussaid,<sup>2</sup> Nicolas Chapuis,<sup>2,3</sup> Olivier Kosmider,<sup>2,3</sup> Didier Bouscary,<sup>1,3</sup> Jerome Tamburini<sup>1,3,4,5</sup> and Justine Decroocq<sup>1</sup>

<sup>1</sup>Assistance Publique-Hôpitaux de Paris, Centre-Université de Paris, Service d'Hématologie Clinique, Hôpital Cochin, Paris, France; <sup>2</sup>Hematology Laboratory, Assistance Publique-Hôpitaux de Paris, Centre-Université de Paris, Cochin Hospital, Paris, France; <sup>3</sup>Université de Paris, Institut Cochin, CNRS UMR8104, INSERM U1016, Paris, France; <sup>4</sup>Translational Research Center in Onco-hematology, Faculty of Medicine, University of Geneva, Geneva, Switzerland and <sup>5</sup>Swiss Cancer Center Leman, Geneva, Switzerland

Correspondence:

J. DECROOCQ - justine.decroocq@aphp.fr

<https://doi.org/10.3324/haematol.2022.282009>

## Supplemental data

**Table S1. Record of toxicities during AZA maintenance.**

|                                                          | <b>N = 39</b> |
|----------------------------------------------------------|---------------|
| <b>AZA maintenance cycles</b>                            |               |
| Median (range)                                           | 6 (1-38)      |
| Mean (standard deviation)                                | 10.7 (10.5)   |
| <b>AZA schedule modification, n (%)</b>                  |               |
| Yes                                                      | 14 (36)       |
| No                                                       | 22 (56)       |
| Missing data                                             | 3 (8)         |
| <b>Type of modification, n (%)</b>                       |               |
| 5 days AZA every 28 days                                 | 7 (18)        |
| 7 days AZA every 6 weeks                                 | 4 (10)        |
| 5 days AZA every 6 weeks                                 | 3 (8)         |
| <b>Cause of dose reduction, n (%)</b>                    |               |
| Cytopenia                                                | 9 (23)        |
| Infection                                                | 3 (8)         |
| Nausea                                                   | 1 (2.5)       |
| Systematic reduction                                     | 1 (2.5)       |
| <b>Cause of AZA discontinuation, n (%)</b>               |               |
| Persistent CR                                            | 7 (18)        |
| HSCT                                                     | 2 (5)         |
| Relapse/progression                                      | 14 (36)       |
| Other cancer                                             | 1 (2.5)       |
| Death                                                    | 1 (2.5)       |
| Cytopenia                                                | 3 (8)         |
| Infection                                                | 3 (8)         |
| Nausea                                                   | 1 (2.5)       |
| Unknown                                                  | 3 (8)         |
| <b>Patients receiving AZA at end of follow up, n (%)</b> | <b>4 (10)</b> |

**Figure S1. Genomic landscape at diagnostic of patients treated with AZA maintenance.**

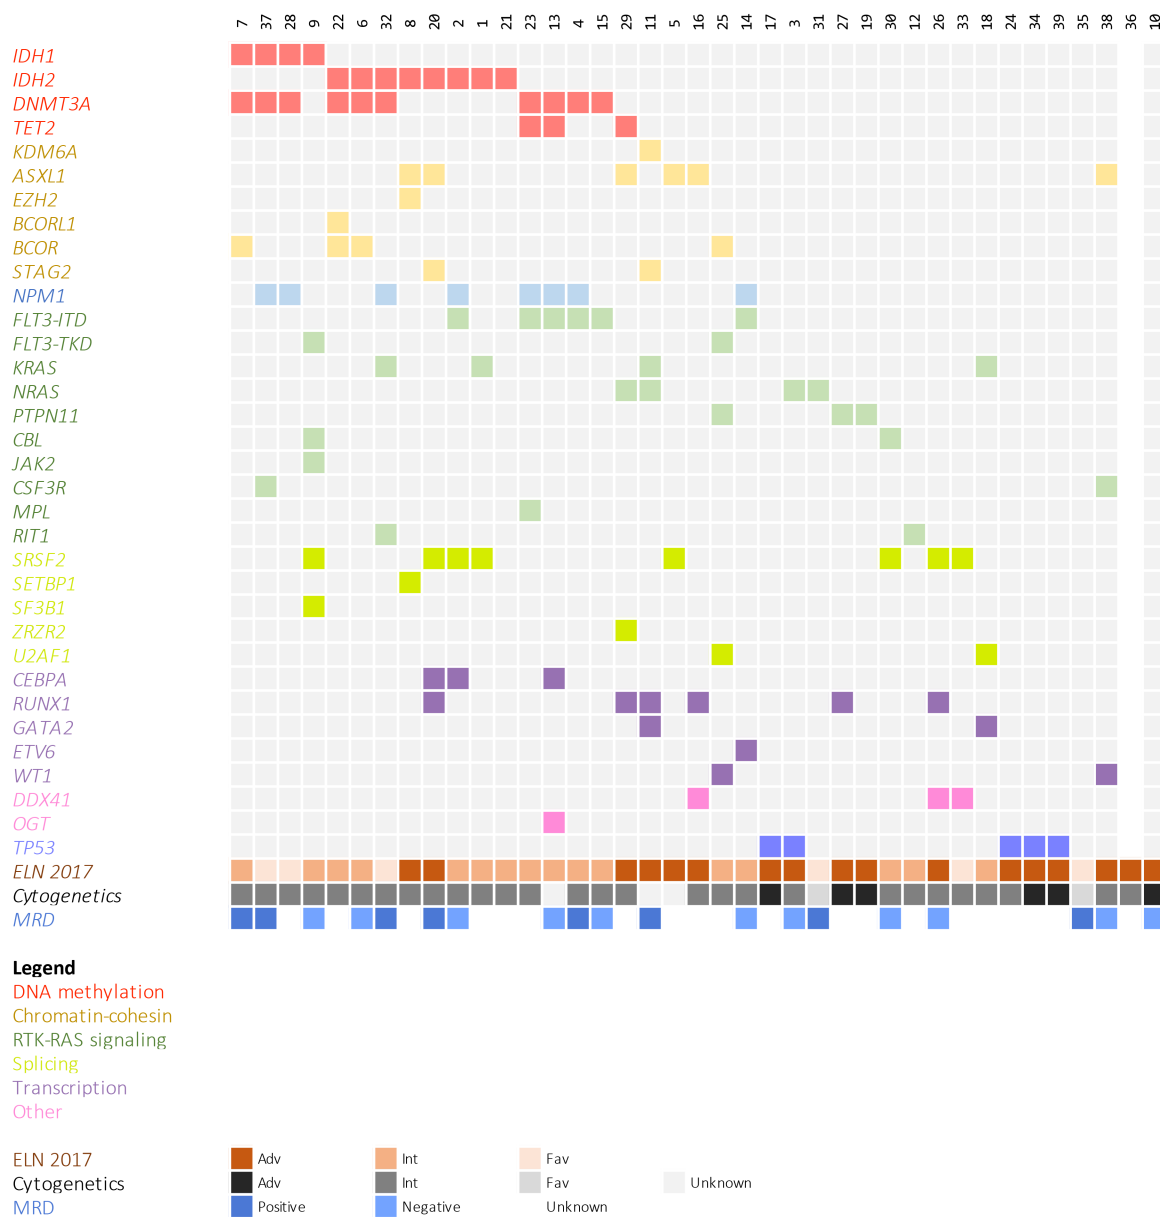

**Figure S2. Hypothesis on clonal evolution during AZA maintenance.** The first time point (referred to as month 0) corresponds to diagnosis. Next, the following point corresponds to remission and variant allele frequency is by convention represented at 0% at month 1 as in most situation (except patients 6 and 22) NGS was not performed on remission samples. In one case (Patient 22), NGS was performed during a first remission, then at relapse, then during a second remission and finally at the time of a second relapse at month 63. Clonal evolution illustrations were performed using the “fishplot” package for R (version 0.5.1).

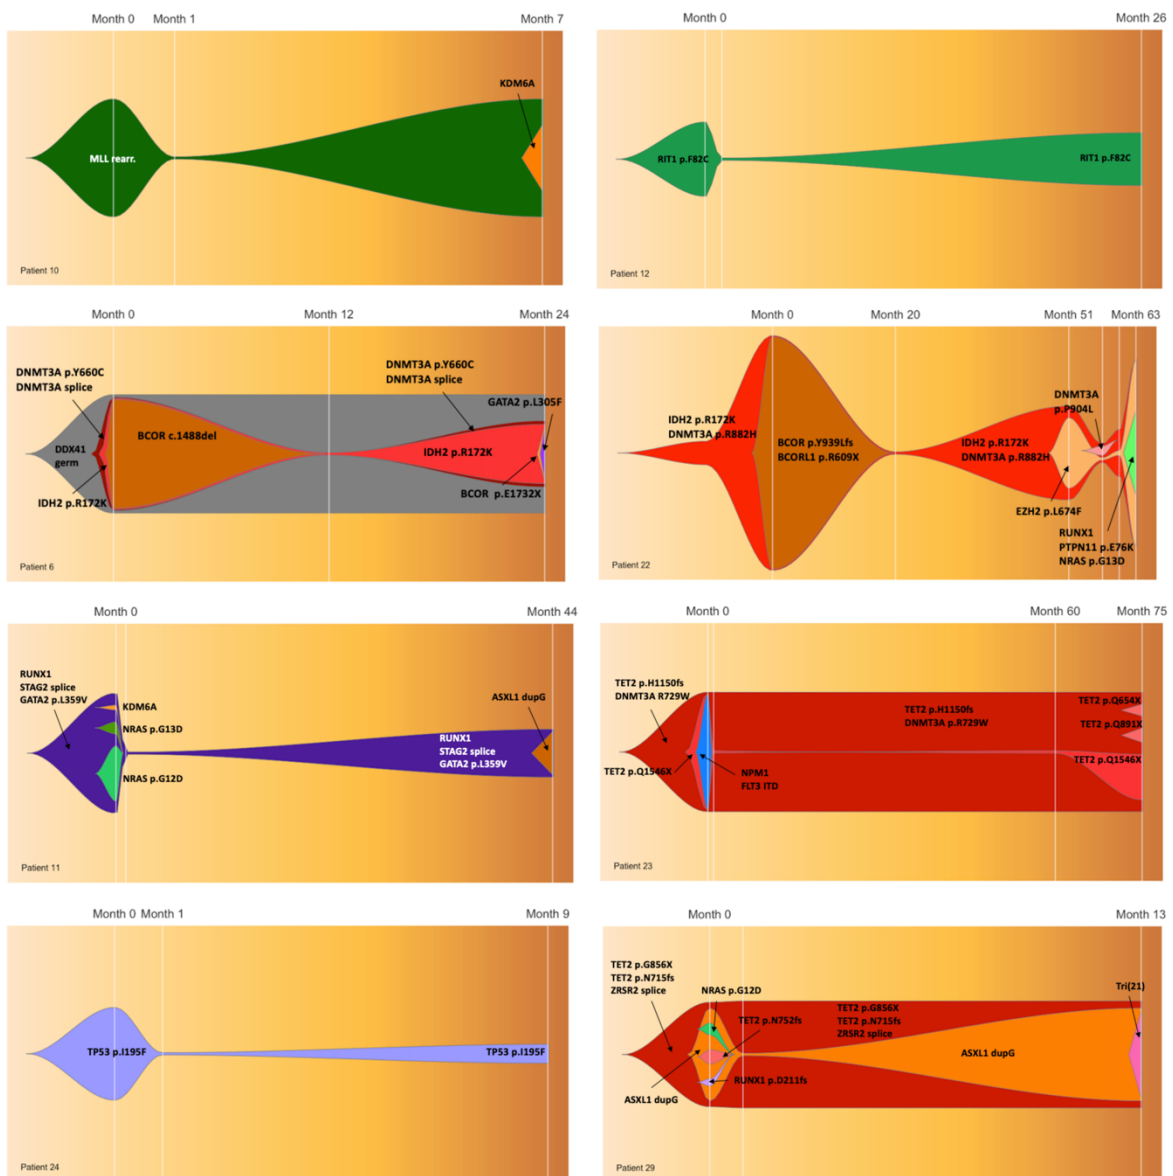

Supplement: 2022_282009_JOHNSON_SUPPL.pdf [file 2022_282009_JOHNSON_SUPPL.pdf]
